# Supplementary material for: Relationships between burnout, turnover intention, job satisfaction, job demands and job resources for mental health personnel in an Australian mental health service
Source: Springer Nature journal article supplement (doi:10.1186/s12913-018-3841-z), 2019-01-23
Supplement: MOESM2 [file 16415614]

## **SUPPLEMENTARY ONLINE MATERIAL**

### **Job Demands Resources Questionnaire**

#### ***Introduction***

As no questionnaires exploring job demands and job resources were available in English, the Job Demands Resources Questionnaire was developed from items and concepts reported in published literature.

Within the questionnaire, there are 10 statements referring to job demands and 15 statements referring to job resources. These are then further broken down into sub-categories to allow for the exploration of relationships between specific job demands or job resources and various outcome variables (e.g., burnout, turnover intention or job satisfaction).

Respondents are requested to report their level of agreement with each statement according to a 5-point Likert scale (1 = strongly disagree, 2 = disagree, 3 = neither agree nor disagree; 4 = agree, 5 = strongly agree).

Items are scored in such a way that higher scores represent the presence of a larger degree of job demands or job resources. To achieve this, the scores for several items (items 5, 9, 20 and 21) are reversed prior to calculation of total scores.

Items and information about them are presented in Table S1.

**Table S1.** Item descriptions, Job Demands and Resources Questionnaire

| <b>Item</b>                                                                                     | <b>Category</b>  | <b>Sub-<br/>category</b>   | <b>Scoring</b> | <b>Developed<br/>from</b> |
|-------------------------------------------------------------------------------------------------|------------------|----------------------------|----------------|---------------------------|
| 1. My achievements are recognised by my supervisor / manager                                    | Job<br>Resources | Rewards and<br>recognition | Standard       | [1]                       |
| 2. The job requires me to keep track of more than one thing at a time                           | Job<br>Demands   | Cognitive<br>demands       | Standard       | [1]                       |
| 3. My work requires a lot of concentration                                                      | Job<br>Demands   | Cognitive<br>demands       | Standard       | [2]                       |
| 4. The job gives me a chance to use my personal initiative or judgment in carrying out the work | Job<br>Resources | Job control                | Standard       | [1]                       |
| 5. Only the management decides what everybody has to do                                         | Job<br>Resources | Participation              | Reversed       | [3]                       |
| 6. My work is emotionally demanding                                                             | Job<br>Demands   | Emotional<br>demands       | Standard       | [2]                       |
| 7. My supervisor is concerned about the welfare of the people that work for him/her             | Job<br>Resources | Supervisor<br>support      | Standard       | [1]                       |
| 8. The job gives me considerable opportunity for independence and freedom in how I do the work  | Job<br>Resources | Job control                | Standard       | [1]                       |

| <b>Item</b>                                                                                                     | <b>Category</b> | <b>Sub-<br/>category</b> | <b>Scoring</b> | <b>Developed<br/>from</b> |
|-----------------------------------------------------------------------------------------------------------------|-----------------|--------------------------|----------------|---------------------------|
| 9. I always have enough time to perform my tasks                                                                | Job Demands     | Time pressure            | Reversed       | [3]                       |
| 10. I receive feedback on my performance from other people in my organization (such as my manager or coworkers) | Job Resources   | Feedback                 | Standard       | [1]                       |
| 11. I get enough feedback about the quality of my performance                                                   | Job Resources   | Feedback                 | Standard       | [3]                       |
| 12. My supervisor / manager inspires me to do my best work                                                      | Job Resources   | Supervisor support       | Standard       | [4]                       |
| 13. My colleagues are willing to give me help if I ask for it                                                   | Job Resources   | Social support           | Standard       | [4]                       |
| 14. My job is physically taxing                                                                                 | Job Demands     | Physical workload        | Standard       | [3]                       |
| 15. It is physically taxing for me to get used to my working times                                              | Job Demands     | Shift work               | Standard       | [3]                       |
| 16. My achievements are recognised by my colleagues                                                             | Job Resources   | Rewards and recognition  | Standard       | [1]                       |
| 17. My performance is rewarded properly                                                                         | Job Resources   | Rewards and recognition  | Standard       | [3]                       |

| <b>Item</b>                                                                                                         | <b>Category</b>  | <b>Sub-<br/>category</b>  | <b>Scoring</b> | <b>Developed<br/>from</b> |
|---------------------------------------------------------------------------------------------------------------------|------------------|---------------------------|----------------|---------------------------|
| 18. My supervisor uses his / her influence to help me solve problems                                                | Job<br>Resources | Supervisor support        | Standard       | [1]                       |
| 19. The job allows me to make my own decisions about how to schedule my work                                        | Job<br>Resources | Job control               | Standard       | [1]                       |
| 20. My working hours allow me to meet my family and personal obligations                                            | Job<br>Demands   | Work-home interference    | Reverse        | [2]                       |
| 21. My physical working conditions – climate, light, noise, design of the working place, and material – are alright | Job<br>Demands   | Physical environment      | Reverse        | [3]                       |
| 22. My job requires working very hard or very fast                                                                  | Job<br>Demands   | Workload                  | Standard       | [2]                       |
| 23. I feel my job is secure                                                                                         | Job<br>Resources | Job security              | Standard       | [3]                       |
| 24. My contact with persons to whom I have to offer services is demanding                                           | Job<br>Demands   | Recipient contact demands | Standard       | [3]                       |

| Item                                             | Category         | Sub-<br>category  | Scoring  | Developed<br>from |
|--------------------------------------------------|------------------|-------------------|----------|-------------------|
| 25. I have good relationships with my colleagues | Job<br>Resources | Social<br>support | Standard | [2]               |

## REFERENCES

1. Morgeson FP, Humphrey SE: The Work Design Questionnaire (WDQ): Developing and validating a comprehensive measure for assessing job design and the nature of work. *J Appl Psychol* 2006, 91:1321-1339; doi:10.1037/0021-9010.91.6.1321.
2. Van den Broeck A, De Cuyper N, De Witte H, Vansteenkiste M: Not all job demands are equal: Differentiating job hindrances and job challenges in the Job Demands-Resources model. *European Journal of Work and Organizational Psychology* 2010, 19:735-759; doi:10.1080/13594320903223839.
3. Demerouti E, Bakker AB, Nachreiner F, Schaufeli WB: The Job Demands-Resources Model of burnout. *J Appl Psychol* 2001, 86:499-512; doi:10.1037//0021-9010.86.3.499.
4. Bakker AB, Demerouti E, Euwema MC: Job resources buffer the impact of job demands on burnout. *J Occup Health Psychol* 2005, 10:170-180; doi:10.1002/hrm.20004.
